# Supplementary material for: Multifunctional N-P-doped carbon dots for regulation of apoptosis and autophagy in B16F10 melanoma cancer cells and in vitro imaging applications
Source: PubMed Central journal article supplement (PMC7359102; doi:10.7150/thno.42291), 2020-06-22
Supplement: thnov10p7841s1.pdf [file thnov10p7841s1.pdf]

## Supplementary Information

### **Multifunctional N-P-doped carbon dots for regulation of apoptosis and autophagy in B16F10 melanoma cancer cells and *in vitro* imaging applications**

Vivek K. Bajpai<sup>1</sup>, Imran Khan<sup>2,3</sup>, Shruti Shukla<sup>4</sup>, Sung-Min Kang<sup>5</sup>, Faisal Aziz<sup>3</sup>, Kumud Malika Tripathi<sup>6</sup>, Deepika Saini<sup>7</sup>, Hye-Jin Cho<sup>8</sup>, Nam Su Heo<sup>9</sup>, Sumit K. Sonkar<sup>7,\*</sup>, Lei Chen<sup>10,\*</sup>, Yun Suk Huh<sup>2,\*</sup>, Young Kyu Han<sup>1,\*</sup>

<sup>1</sup> Department of Energy and Materials Engineering, Dongguk University-Seoul, 30 Pildong-ro 1-gil, Seoul 04620, Republic of Korea

<sup>2</sup> Department of Biological Engineering, Biohybrid Systems Research Center (BSRC), Inha University, 100 Inha-ro, Nam-gu, Incheon 22212, Republic of Korea

<sup>3</sup> The Hormel Institute, University of Minnesota, Austin, MN, 55912, USA

<sup>4</sup> Department of Food Science and Technology, National Institute of Food Technology Entrepreneurship and Management (NIFTEM), Sonapat, Haryana 131028, India

<sup>5</sup> Wallace H. Coulter Department of Biomedical Engineering, Georgia Institute of Technology and Emory School of Medicine, Atlanta, Georgia, 30332, USA

<sup>6</sup> Department of Chemistry, Indian Institute of Petroleum and Energy, Visakhapatnam 531035, Andhra Pradesh, India.

<sup>7</sup> Department of Chemistry, Malaviya National Institute of Technology, Jaipur, Jaipur 302017, India

<sup>8</sup> Reliability Assessment Center for Chemical Materials, Korea Research Institute of Chemical Technology (KRICT), 141 Gajeong-ro, Yuseong-gu, Daejeon 305-600,

Republic of Korea

<sup>9</sup> Research Center for Materials Analysis, Korea Basic Science Institute (KBSI), Daejeon

34133, Republic of Korea

<sup>10</sup> College of Food Science, Fujian Agriculture and Forestry University, Fuzhou, Fujian

350002, China

**Running head:** Anticancer potential of N-P-doped carbon nanodots

**Corresponding authors:** **Sumit K. Sonkar** (E-mail: [sksonkar.chy@mnit.ac.in](mailto:sksonkar.chy@mnit.ac.in)); **Lei**

**Chen** (E-mail: [chenlei841114@hotmail.com](mailto:chenlei841114@hotmail.com)); **Yun Suk Huh** (E-mail:

[yunsuk.huh@inha.ac.kr](mailto:yunsuk.huh@inha.ac.kr)); **Young-Kyu Han** (E-mail: [ykenegy@dongguk.edu](mailto:ykenegy@dongguk.edu))

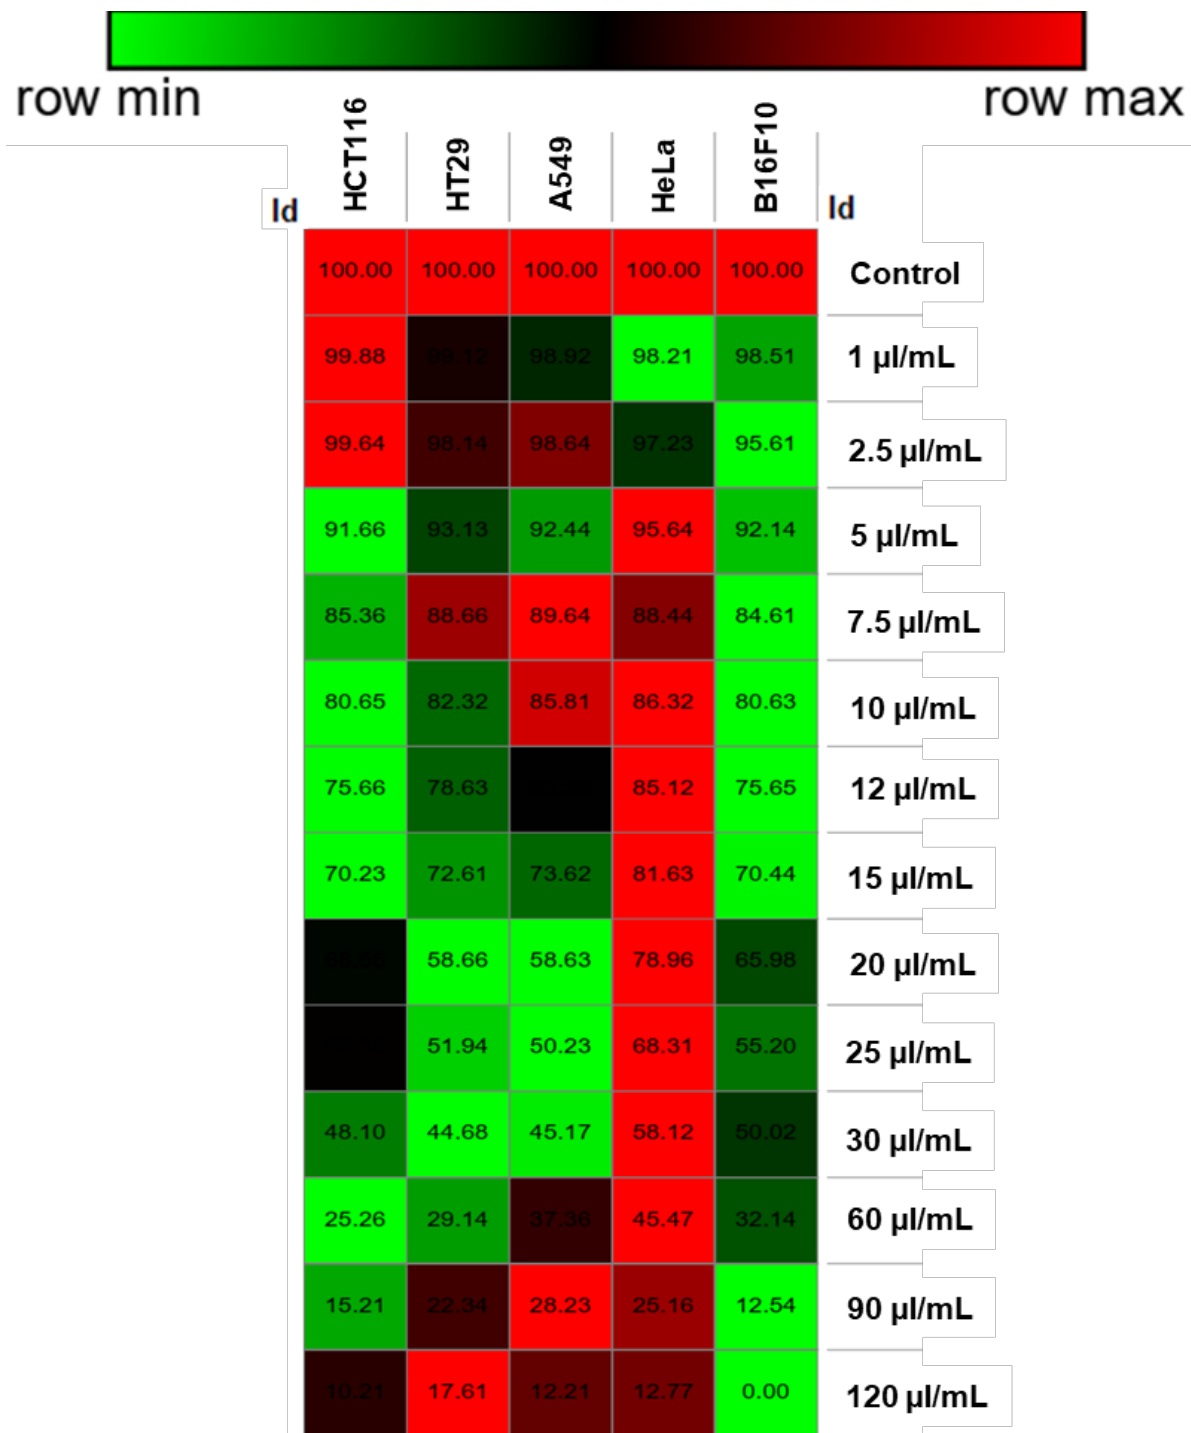

**Figure S1** Heatmap showing the anticancer activities (% cell viability) of NPCDs (0-120 µL/mL) on different cancer cells HCT116, HT29, A549, HeLa, and B16F10 cells.

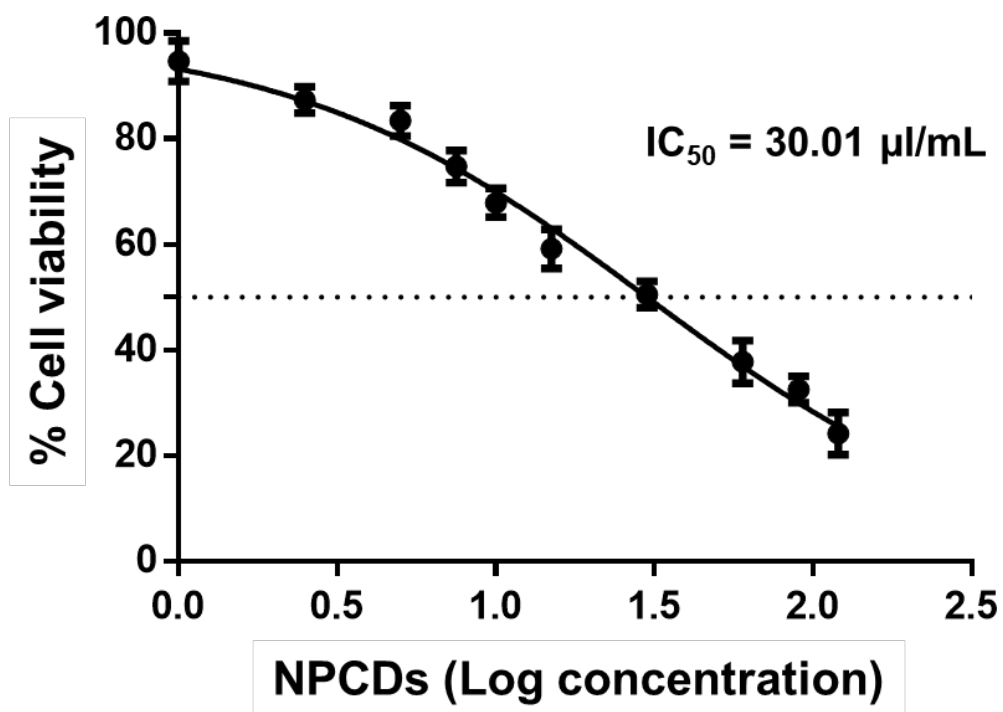

**Figure S2** Anticancer activity of NPCDs evaluated by MTT assay, effect of NPCDs (0-120 µL/mL) on B16F10 melanoma cells.

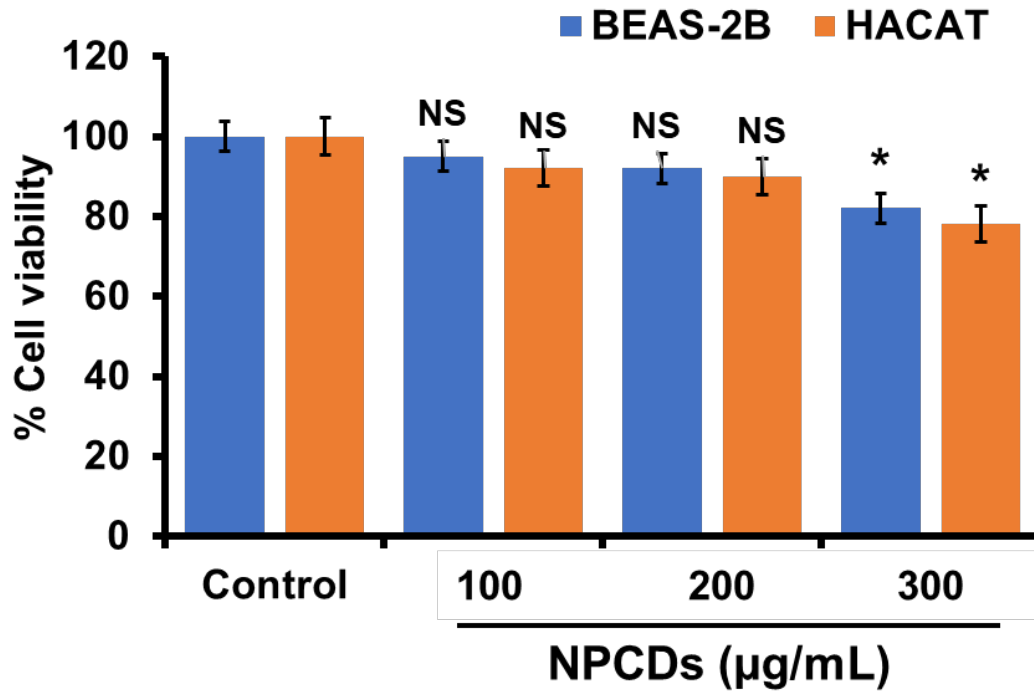

**Figure S3** Cytotoxicity of NPCDs on BEAS-2B human lung epithelial cells and HACAT as human keratinocytes.

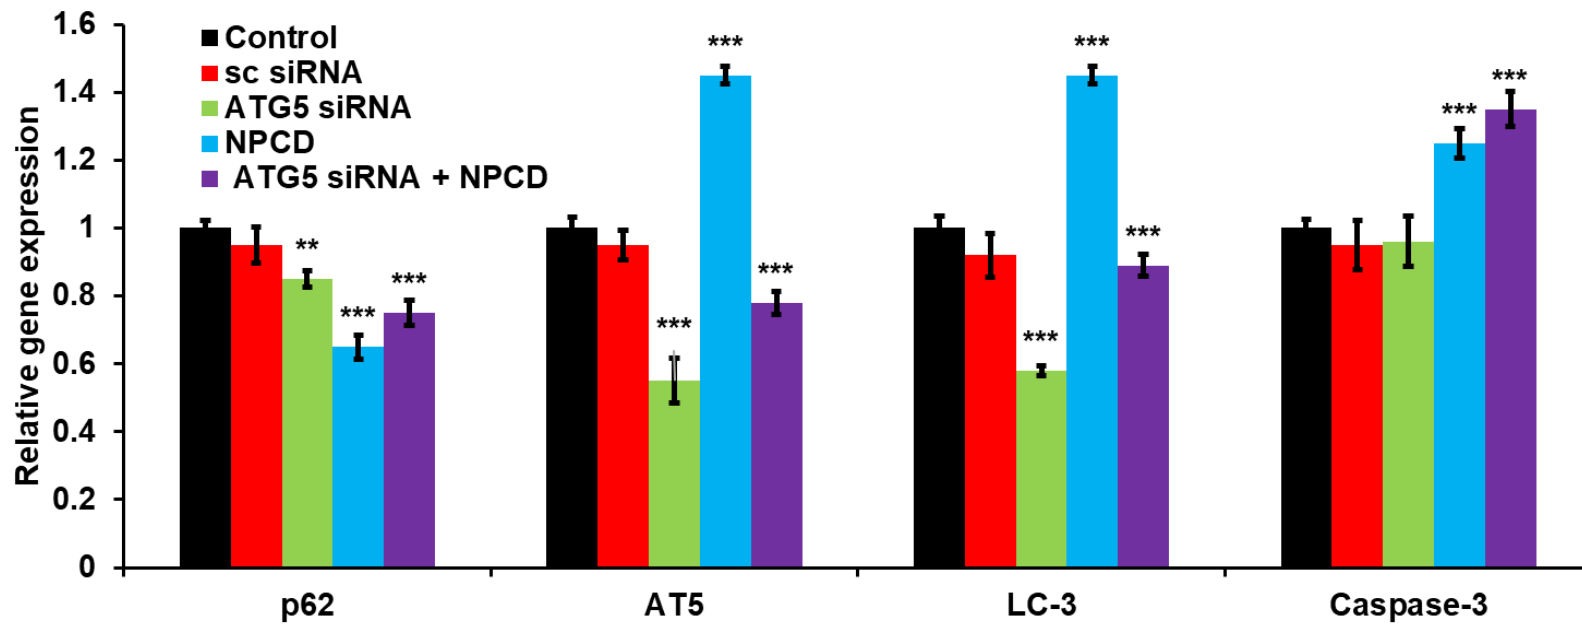

**Figure S4.** Autophagy attenuated by siRNA ATG5. The efficiency of siRNA mediated knockdown of ATG5 in B16F10 cells was examined by RT-PCR.

**Table S1** Primary and secondary antibodies used in the study.

| Sr. No. | Primary Antibody used   | Dilution used | Secondary antibody used     | Company                   |
|---------|-------------------------|---------------|-----------------------------|---------------------------|
| 1       | Bax (Rabbit)            | 1:1000        | Anti-rabbit IgG, HRP-linked | Cell signaling technology |
| 2       | Bcl2 (Rabbit)           | 1:1000        | Anti-rabbit IgG, HRP-linked | Cell signaling technology |
| 3       | Caspase-3 (Rabbit)      | 1:1000        | Anti-rabbit IgG, HRP-linked | Cell signaling technology |
| 4       | $\beta$ -actin (Rabbit) | 1:1000        | Anti-rabbit IgG, HRP-linked | Cell signaling technology |
| 5       | CDK-2 (Rabbit)          | 1:1000        | Anti-rabbit IgG, HRP-linked | Cell signaling technology |
| 6       | CDK-4 (Rabbit)          | 1:1000        | Anti-rabbit IgG, HRP-linked | Cell signaling technology |
| 7       | CDK-6 (Rabbit)          | 1:1000        | Anti-rabbit IgG, HRP-linked | Cell signaling technology |
| 8       | p21 (Rabbit)            | 1:1000        | Anti-rabbit IgG, HRP-linked | Cell signaling technology |
| 9       | LC-3 (Rabbit)           | 1:1000        | Anti-rabbit IgG, HRP-linked | Cell signaling technology |
| 10      | p62 (Rabbit)            | 1:1000        | Anti-rabbit IgG, HRP-linked | Cell signaling technology |
| 11      | ATG-5 (Rabbit)          | 1:1000        | Anti-rabbit IgG, HRP-linked | Cell signaling technology |

Secondary antibody dilution used 1:10,000 (Cell Signaling Technology).

Restore™ PLUS Western Blot Stripping Buffer.

**Table S2** Primers used in this study.

---

| Primers                          | Sequence              | Applications  |
|----------------------------------|-----------------------|---------------|
| <i>atg5-f</i>                    | AGGCAACCTGACCAGAAACA  | Real time PCR |
| <i>atg5-r</i>                    | GAGGAAAGCAGAGGTGATGC  | Real time PCR |
| <i>p62-f</i>                     | TGCCCAGACTACGACTTGTG  | Real time PCR |
| <i>p62-r</i>                     | AGTGTCCGTGTTTCACCTTCC | Real time PCR |
| <i>lc3-f</i>                     | AGCAGCATCCAACCAAATC   | Real time PCR |
| <i>lc3-r</i>                     | CTGTGTCCGTTCACCAACAG  | Real time PCR |
| <i>caspase3-f</i>                | TGAGCCATGGTGAAGAAGGA  | Real time PCR |
| <i>caspase3-r</i>                | TCGGCCTCCACTGGTATTTT  | Real time PCR |
| <i><math>\beta</math>actin-f</i> | TCCCTGTATGCCTCTGGTCGT | Real time PCR |
| <i><math>\beta</math>actin-r</i> | AAGCTGTAGCCTCTCTCGGTC | Real time PCR |

---
